# Supplementary material for: Various machine learning approaches coupled with molecule simulation in the screening of natural compounds with xanthine oxidase inhibitory activity
Source: Royal Society of Chemistry journal article supplement (doi:10.1039/d0fo03059g), 2021-01-01
Supplement: d0fo03059g1.xlsx [file d0fo03059g1.xlsx]

## Sheet: Sheet1
Compound ID	PubChem CID	CAS	Canonical SMILES	InChI Key	Chemical name	Type	ref_doi	PMID
1	5487766	549-31-5	COC1=C(C=CC(=C1)C2=C(C(=O)C3=C(C=C(C=C3O2)O)O)OS(=O)(=O)O)O	CZFNXFXZXWDYMZ-UHFFFAOYSA-N	persicarin	XOI	10.1111/cbdd.13437	30403440
2	5281612	520-34-3	COC1=C(C=C(C=C1)C2=CC(=O)C3=C(C=C(C=C3O2)O)O)O	MBNGWHIJMBWFHU-UHFFFAOYSA-N	diosmetin	XOI	10.1111/cbdd.13437	30403440
3	5280343	117-39-5	O=C1C(O)=C(c2cc(O)c(O)cc2)Oc2c1c(O)cc(O)c2	REFJWTPEDVJJIY-UHFFFAOYSA-N	Quercetin	XOI	10.1016/j.jep.2004.03.037	15182918
4	5280805	153-18-4	O=C1C(OC2C(O)C(O)C(O)C(COC3C(O)C(O)C(O)C(C)O3)O2)=C(c2cc(O)c(O)cc2)Oc2c1c(O)cc(O)c2	IKGXIBQEEMLURG-NVPNHPEKSA-N	Quercetin 3-rutinoside	XOI	10.1016/j.jep.2004.03.037	15182918
5	367141	25615-05-8	O=C(OC1C(c2cc(O)c(O)cc2)Oc2c(c(O)cc(O)c2)C1)c1cc(O)c(O)c(O)c1	LSHVYAFMTMFKBA-UHFFFAOYSA-N	Epicatechingallate	XOI	10.1016/j.jff.2016.12.020	not availiable
6	72277	970-74-1	C1C(C(OC2=CC(=CC(=C21)O)O)C3=CC(=C(C(=C3)O)O)O)O	XMOCLSLCDHWDHP-IUODEOHRSA-N	Epigallocatechin	XOI	10.1016/j.jff.2016.12.020	not availiable
7	72276	490-46-0	Oc1c(O)ccc(C2C(O)Cc3c(O)cc(O)cc3O2)c1	PFTAWBLQPZVEMU-UKRRQHHQSA-N	Epicatechin	XOI	10.1016/j.jff.2016.12.020	not availiable
8	65084	970-73-0	C1C(C(OC2=CC(=CC(=C21)O)O)C3=CC(=C(C(=C3)O)O)O)O	XMOCLSLCDHWDHP-SWLSCSKDSA-N	Gallocatechin	XOI	10.1016/j.jff.2016.12.020	not availiable
9	5281672	529-44-2	O=C1C(O)=C(c2cc(O)c(O)c(O)c2)Oc2c1c(O)cc(O)c2	IKMDFBPHZNJCSN-UHFFFAOYSA-N	Myricetin	XOI	10.1016/j.jff.2016.12.020	not availiable
10	72	99-50-3	O=C(O)c1cc(O)c(O)cc1	YQUVCSBJEUQKSH-UHFFFAOYSA-N	3,4-Dihydroxybenzoic acid	XOI	10.1016/j.jff.2016.12.020	not availiable
11	5377686	100041-05-2	O=C(O)c1nc(-c2oc(CO)cc2)c2[nH]c3c(c2c1)cccc3	USBWYUYKHHILLZ-UHFFFAOYSA-N	Flazin	XOI	10.1016/j.jff.2016.12.020	not availiable
12	5280961	446-72-0	O=C1C(c2ccc(O)cc2)=COc2c1c(O)cc(O)c2	TZBJGXHYKVUXJN-UHFFFAOYSA-N	Genistein	XOI	10.1021/acs.jafc.6b01094	27181598
13	289	120-80-9	Oc1c(O)cccc1	YCIMNLLNPGFGHC-UHFFFAOYSA-N	Catechol	XOI	10.1021/acs.jafc.6b01094	27181598
14	6438503	55912-03-3	O=C(C=Cc1ccc(O)cc1)c1c(O)c(CC=C(C)C)c(OC)cc1	XDKYBPGIBVMHHB-KPKJPENVSA-N	4-hydroxyderricin	XOI	10.1016/j.foodchem.2013.12.026	24491695
15	5281255	20784-50-3	O=C(C=Cc1ccc(O)cc1)c1c(O)c(CC=C(C)C)c(O)cc1	DUWPGRAKHMEPCM-IZZDOVSWSA-N	Isobavachalcone	XOI	10.1016/j.foodchem.2013.12.026	24491695
16	643007	62949-76-2	O=C(C=Cc1ccc(O)cc1)c1c(O)c(CC=C(CCC=C(C)C)C)c(O)cc1	LRSMBOSQWGHYCW-MDGZPELGSA-N	Xanthoangelol	XOI	10.1016/j.foodchem.2013.12.026	24491695
17	10409180	132998-81-3	O=C(C=Cc1ccc(O)cc1)c1c(O)c(CC=C(CCC(O)C(=C)C)C)c(O)cc1	NCHZAFAGBAEJJJ-BAYITLGHSA-N	Xanthoangelol B	XOI	10.1016/j.foodchem.2013.12.026	24491695
18	6479088	265652-71-9	O=C(C=Cc1ccc(O)cc1)c1c(O)c(CC=C(CCC=C(C)C)C)c(OC)cc1	XBFSDEKOTLYPJU-SXZUIPJJSA-N	Xanthoangelol F	XOI	10.1016/j.foodchem.2013.12.026	24491695
19	5281600	1617-53-4	O=C1c2c(O)cc(O)c(-c3c(O)ccc(C=4Oc5c(c(O)cc(O)c5)C(=O)C=4)c3)c2OC(c2ccc(O)cc2)=C1	YUSWMAULDXZHPY-UHFFFAOYSA-N	Amentoflavone	XOI	10.1007/s00216-014-8132-x	25240932
20	99474	512-04-9	OC1CC=2C(C)(C3C(C4C(C)(C5C(C)C6(OC5C4)OCC(C)CC6)CC3)CC=2)CC1	WQLVFSAGQJTQCK-VKROHFNGSA-N	Diosgenin	XOI	10.1007/s00216-014-8132-x	25240932
21	6438825	99217-68-2	O=C(C=Cc1cc(O)c(O)cc1)c1c(O)cc(O)c(CC=C(C)C)c1	FEALTYYKRMRXTG-QPJJXVBHSA-N	Broussochalcone A	XOI	10.1007/s13765-012-2143-0	not availiable
22	1794427	327-97-9	O=C(OC1C(O)C(O)CC(O)(C(=O)O)C1)C=Cc1cc(O)c(O)cc1	CWVRJTMFETXNAD-JUHZACGLSA-N	Chlorogenic acid	XOI	10.1016/j.jep.2012.04.052	22575704
23	689043	331-39-5	O=C(O)C=Cc1cc(O)c(O)cc1	QAIPRVGONGVQAS-DUXPYHPUSA-N	Caffeic acid	XOI	10.1016/j.jep.2012.04.052	22575704
24	5281718	27208-80-6	O(c1cc(O)cc(C=Cc2ccc(O)cc2)c1)C1C(O)C(O)C(O)C(CO)O1	HSTZMXCBWJGKHG-CUYWLFDKSA-N	Polydatin	XOI	10.1016/j.jep.2012.04.052	22575704
25	445154	501-36-0	Oc1cc(O)cc(C=Cc2ccc(O)cc2)c1	LUKBXSAWLPMMSZ-OWOJBTEDSA-N	Resveratrol	XOI	10.1016/j.jep.2012.04.052	22575704
26	119258	29838-67-3	O=C1C(OC2C(O)C(O)C(O)C(C)O2)C(c2cc(O)c(O)cc2)Oc2c1c(O)cc(O)c2	ZROGCCBNZBKLEL-MPRHSVQHSA-N	Astilbin	XOI	10.1016/j.jep.2012.04.052	22575704
27	73145	559-70-6	OC1C(C)(C)C2C(C)(C3C(C)(C4(C)C(C5C(C)(CC4)CCC(C)(C)C5)=CC3)CC2)CC1	JFSHUTJDVKUMTJ-QHPUVITPSA-N	β-amyrin	XOI	10.1021/jf1041382	21158429
28	550598	1891-34-5	O=C(C(C)C)C1C(=O)C(=O)C(CC=C(C)C)(CC=C(C)C)C1=O	HMEGPOIWNGKXBR-UHFFFAOYSA-N	Cohulupone	XOI	10.1021/ajf1041382	21158429
29	15560442	not availiable	O=C1C(O)=C(c2cc(O)c(O)cc2)Oc2c(O)c(O)ccc12	RHTZDFORBKRGQU-UHFFFAOYSA-N	Melanoxetin	XOI	10.1016/j.jep.2010.10.027	20965242
30	5281294	38081-56-0	O=C(C=Cc1cc(O)c(O)cc1)c1c(O)c(O)c(O)cc1	GSBNFGRTUCCBTK-DAFODLJHSA-N	Okanin	XOI	10.1016/j.jep.2010.10.027	20965242
31	5280445	491-70-3	O=C1c2c(O)cc(O)cc2OC(c2cc(O)c(O)cc2)=C1	IQPNAANSBPBGFQ-UHFFFAOYSA-N	luteolin	XOI	10.1080/14786410802228736	19296380
32	440735	552-58-9	O=C1c2c(O)cc(O)cc2OC(c2cc(O)c(O)cc2)C1	SBHXYTNGIZCORC-ZDUSSCGKSA-N	Eriodictyol	XOI	10.1080/14786410802228736	19296380
33	64971	472-15-1	O=C(O)C12C(C(C(=C)C)CC1)C1C(C)(C3(C)C(C4(C)C(C(C)(C)C(O)CC4)CC3)CC1)CC2	not availiable	Betulinic acid	XOI	10.1080/14786410802228736	19296380
34	5280804	482-35-9	C1=CC(=C(C=C1C2=C(C(=O)C3=C(C=C(C=C3O2)O)O)OC4C(C(C(C(O4)CO)O)O)O)O)O	OVSQVDMCBVZWGM-QSOFNFLRSA-N	isoquercitrin	XOI	10.1111/cbdd.13437	30403440
35	10151874	60202-70-2	O=C(O)c1c(Oc2c(O)c3OC(=O)c4c-5c(c(O)c(O)c4)OC(=O)c(c3-5)c2)c(O)c(O)c(O)c1	BPAOAXAAABIQKR-UHFFFAOYSA-N	Valoneic acid dilactone	XOI	10.1016/j.jep.2004.04.012	15234783
36	5281855	476-66-4	O=C1Oc2c(O)c(O)cc3C(=O)Oc4c(O)c(O)cc1c4-c23	AFSDNFLWKVMVRB-UHFFFAOYSA-N	Ellagic acid	XOI	10.1016/j.jep.2004.04.012	15234783
37	114829	578-86-9	O=C1c2c(OC(c3ccc(O)cc3)C1)cc(O)cc2	FURUXTVZLHCCNA-AWEZNQCLSA-N	Liquiritigenin	XOI	10.1007/PL00000710	10823249
38	638278	961-29-5	O=C(C=Cc1ccc(O)cc1)c1c(O)cc(O)cc1	DXDRHHKMWQZJHT-FPYGCLRLSA-N	Isoliquiritigenin	XOI	10.1007/PL00000710	10823249
39	6917976	11021-13-9	O(C(CCC=C(C)C)(C)C1C2C(C)(C3(C)C(C4(C)C(C(C)(C)C(OC5C(OC6C(O)C(O)C(O)C(CO)O6)C(O)C(O)C(CO)O5)CC4)CC3)CC2O)CC1)C1C(O)C(O)C(O)C(COC2C(O)C(O)C(O)CO2)O1	NODILNFGTFIURN-GZPRDHCNSA-N	Ginsenoside Rb2	XOI	10.1016/j.talanta.2014.12.005	25618720
40	5280637	5373-11-5	O=C1c2c(O)cc(OC3C(O)C(O)C(O)C(CO)O3)cc2OC(c2cc(O)c(O)cc2)=C1	PEFNSGRTCBGNAN-QNDFHXLGSA-N	Cynaroside	XOI	10.1016/j.talanta.2014.12.005	25618720
41	12304093	578-74-5	O=C1c2c(O)cc(OC3C(O)C(O)C(O)C(CO)O3)cc2OC(c2ccc(O)cc2)=C1	KMOUJOKENFFTPU-MKJMBMEGSA-N	Apigenin-7-O-glucoside	XOI	10.1016/j.jchromb.2014.05.001	24861872
42	5280443	520-36-5	O=C1c2c(O)cc(O)cc2OC(c2ccc(O)cc2)=C1	KZNIFHPLKGYRTM-UHFFFAOYSA-N	Apigenin	XOI	10.1016/j.jchromb.2014.05.001	24861872
43	64982	21967-41-9	O=C(O)C1C(O)C(O)C(O)C(Oc2c(O)c(O)c3C(=O)C=C(c4ccccc4)Oc3c2)O1	IKIIZLYTISPENI-ZFORQUDYSA-N	Baicalin	XOI	10.1007/s00216-013-7612-8	24510210
44	5281605	491-67-8	O=C1c2c(O)c(O)c(O)cc2OC(c2ccccc2)=C1	FXNFHKRTJBSTCS-UHFFFAOYSA-N	Baicalein	XOI	10.1007/s00216-013-7612-8	24510210
45	10077207	not availiable	O=C1c2c(O)c(O)c(OC3C(O)C(O)C(O)C(COC4C(O)C(O)C(O)C(CO)O4)O3)cc2OC(c2ccccc2)=C1	HAYLVXFWJCKKDW-IJTBWITGSA-N	Oroxin B	XOI	10.1007/s00216-013-7612-8	24510210
46	5320313	not availiable	O=C1c2c(O)c(O)c(OC3C(O)C(O)C(O)C(CO)O3)cc2OC(c2ccccc2)=C1	IPQKDIRUZHOIOM-IAAKTDFRSA-N	Oroxin A	XOI	10.1007/s00216-013-7612-8	24510210
47	13991590	115841-09-3	O=C(OC(C(=O)O)Cc1cc(O)c(O)cc1)C=Cc1c2c(c(O)cc1)oc(-c1cc(O)c(O)cc1)c2	GCJWPRRNLSHTRY-VURDRKPISA-N	Salvianolic acid C	XOI	10.1007/s00216-014-7902-9	24866714
48	5281793	96574-01-5	O=C(OC(C(=O)O)Cc1cc(O)c(O)cc1)C=Cc1c(C=Cc2cc(O)c(O)cc2)c(O)c(O)cc1	YMGFTDKNIWPMGF-UCPJVGPRSA-N	Salvianolic acid A	XOI	10.1007/s00216-014-7902-9	24866714
49	107876	4852-22-6	O(C1(c2cc(O)c(O)cc2)C(O)C(O)c2c(O)cc(O)cc2O1)C1C(c2cc(O)c(O)cc2)Oc2c(c(O)cc(O)c2)C1	HGVVOUNEGQIPMS-UHFFFAOYSA-N	Procyanidins	XOI	10.3321/j.issn:1001-4454.2006.12.049	30704229
50	5018391	6415-59-4	O=C1OC(CCCC)C2C1=CCCC2	UPJFTVFLSIQQAV-UHFFFAOYSA-N	Neocnidilide	XOI	10.3321/j.issn:1001-4454.2006.12.049	30704229
51	5280666	491-71-4	O(C)c1c(O)ccc(C=2Oc3c(c(O)cc(O)c3)C(=O)C=2)c1	SCZVLDHREVKTSH-UHFFFAOYSA-N	Chrysoeriol	XOI	10.3321/j.issn:1001-4454.2006.12.049	30704229
52	5318645	5041-82-7	COC1=C(C=CC(=C1)C2=C(C(=O)C3=C(C=C(C=C3O2)O)O)OC4C(C(C(C(O4)CO)O)O)O)O	CQLRUIIRRZYHHS-LFXZADKFSA-N	isorhamnetin-3-O-glucoside	XOI	10.1111/cbdd.13437	30403440
53	5281426	93-35-6	O=C1Oc2c(ccc(O)c2)C=C1	ORHBXUUXSCNDEV-UHFFFAOYSA-N	Umbelliferone	XOI	10.1016/j.foodchem.2018.01.139	29502809
54	2355	484-20-8	O(C)c1c2c(occ2)cc2OC(=O)C=Cc12	BGEBZHIAGXMEMV-UHFFFAOYSA-N	Bergapten	XOI	10.3746/pnf.2018.23.2.127	30018891
55	162350	29702-25-8	O=C1c2c(O)c(c(O)cc2OC(c2ccc(O)cc2)=C1)C1C(O)C(O)C(O)C(CO)O1	MYXNWGACZJSMBT-VJXVFPJBSA-N	Isovitexin	XOI	10.1016/S0006-291X(02)00442-4	12054758
56	6441498	28831-65-4	O=C(OC(C(=O)O)Cc1cc(O)c(O)cc1)C=Cc1c2C(C(=O)O)C(c3cc(O)c(O)cc3)Oc2c(O)cc1	UJZQBMQZMKFSRV-RGKBJLTCSA-N	Lithospermic acid	XOI	10.1016/j.jaim.2016.08.006	27894590
57	969516	458-37-7	O=C(C=Cc1cc(OC)c(O)cc1)CC(=O)C=Cc1cc(OC)c(O)cc1	VFLDPWHFBUODDF-FCXRPNKRSA-N	Curcumin	XOI	10.1016/S0014-2999(02)02192-1	12231379
58	5281616	548-83-4	O=C1C(O)=C(c2ccccc2)Oc2c1c(O)cc(O)c2	VCCRNZQBSJXYJD-UHFFFAOYSA-N	Galangin	XOI	10.1016/S0014-2999(02)02192-1	12231379
59	5281607	480-40-0	O=C1c2c(O)cc(O)cc2OC(c2ccccc2)=C1	RTIXKCRFFJGDFG-UHFFFAOYSA-N	Chrysin	XOI	10.1016/S0014-2999(02)02192-1	12231379
60	5281614	528-48-3	O=C1C(O)=C(c2cc(O)c(O)cc2)Oc2c1ccc(O)c2	XHEFDIBZLJXQHF-UHFFFAOYSA-N	Fisetin	XOI	10.1016/S0014-2999(02)02192-1	12231379
61	5281670	480-16-0	O=C1C(O)=C(c2c(O)cc(O)cc2)Oc2c1c(O)cc(O)c2	YXOLAZRVSSWPPT-UHFFFAOYSA-N	Morin	XOI	10.1016/S0014-2999(02)02192-1	12231379
62	5280863	520-18-3	O=C1C(O)=C(c2ccc(O)cc2)Oc2c1c(O)cc(O)c2	IYRMWMYZSQPJKC-UHFFFAOYSA-N	Kaempferol	XOI	10.1016/S0014-2999(02)02192-1	12231379
63	10364	499-75-2	Oc1c(C)ccc(C(C)C)c1	RECUKUPTGUEGMW-UHFFFAOYSA-N	Carvacrol	XOI	10.1016/j.procbio.2019.03.014	not availiable
64	5281807	3681-99-0	O=C1C(c2ccc(O)cc2)=COc2c(c(O)ccc12)C1C(O)C(O)C(O)C(CO)O1	HKEAFJYKMMKDOR-VPRICQMDSA-N	Puerarin	XOI	10.13684/j.cnki.spkj.2014.02.049	not availiable
65	637760	94-41-7	O=C(C=Cc1ccccc1)c1ccccc1	DQFBYFPFKXHELB-VAWYXSNFSA-N	Chalcone	XOI	10.1016/j.foodchem.2013.12.026	24491695
66	73402	560-66-7	O=C(O)C(CCC(C(C)C)=C)C1C2(C)C(C)(C3=C(C4(C)C(C(C)(C)C(O)CC4)CC3)CC2)CC1	UGMQOYZVOPASJF-OXUZYLMNSA-N	Eburicoic acid	XOI	10.14188/j.ajsh.2017.02.004	not availiable
67	1054	65-23-6	CC1=C(O)C(CO)=C(CO)C=N1	LXNHXLLTXMVWPM-UHFFFAOYSA-N	Pyridoxine	XOI	10.1093/jn/24.5.405	not availiable
68	5062	155-58-8	O(C)c1c(O)cc(C=Cc2cc(OC3C(O)C(O)C(O)C(CO)O3)cc(O)c2)cc1	GKAJCVFOJGXVIA-UHFFFAOYSA-N	Rhaponiticin	XOI	10.3390/ijms20112681	31159151
69	5318650	32507-66-7	O(C)c1c(O)ccc(C=Cc2cc(O)cc(O)c2)c1	ANNNBEZJTNCXHY-NSCUHMNNSA-N	Isorhapontigenin	XOI	10.3390/ijms20112681	31159151
70	5281702	520-32-1	COC1=CC(=CC(=C1O)OC)C2=CC(=O)C3=C(C=C(C=C3O2)O)O	HRGUSFBJBOKSML-UHFFFAOYSA-N	Tricin	XOI	10.3390/molecules23102719	30360380
71	11016019	20126-59-4	COC1=C(C=C(C=C1)C2=CC(=O)C3=C(C=C(C=C3O2)OC4C(C(C(C(O4)CO)O)O)O)O)O	WKUHPOMCLBLCOV-MIUGBVLSSA-N	diosmetin-7-O-β-D-glucopyranoside	XOI	10.1111/cbdd.13437	30403440
72	5273755	22368-21-4	COC1=C(C=C(C=C1)C2=CC(=O)C3=C(O2)C=C(C(=C3O)OC)O)OC	DRRWBCNQOKKKOL-UHFFFAOYSA-N	Eupatilin	XOI	10.1111/cbdd.13437	30403440
73	5281656	3542-72-1	O=C1c2c(O)cc(O)cc2Oc2c1cc(O)c(O)c2	ZHTQCPCDXKMMLU-UHFFFAOYSA-N	Norathyriol	XOI	10.1016/j.ejphar.2019.04.034	31009635
74	14032966	not availiable	C1=CC(=C(C=C1C2=CC(=O)C3=C(C=C(C=C3O2)OC4C(C(C(C(O4)COC5C(C(C(C(O5)CO)O)O)O)O)O)O)O)O)O	LDTDRTSKWGQBAA-XPKAMZHISA-N	luteolin-7-O-rutinoside	XOI	10.1111/cbdd.13437	30403440
75	5281654	480-19-3	O(C)c1c(O)ccc(C2=C(O)C(=O)c3c(O)cc(O)cc3O2)c1	IZQSVPBOUDKVDZ-UHFFFAOYSA-N	Isorhamnetin	XOI	10.3390/ijms20112681	31159151
76	5281699	603-61-2	O(C)c1c(O)cc(C2=C(O)C(=O)c3c(O)cc(O)cc3O2)cc1	FPLMIPQZHHQWHN-UHFFFAOYSA-N	Tamarixetin	XOI	10.3390/ijms20112681	31159151
77	5319116	not availiable	C1=CC(=C(C=C1C2=CC(=O)C3=C(C=C(C=C3O2)O)O)O)OC4C(C(C(C(O4)CO)O)O)O	UHNXUSWGOJMEFO-QNDFHXLGSA-N	Luteolin-4'-o-glucoside	XOI	10.1111/cbdd.13437	30403440
78	13093777	not availiable	C1=CC(=C(C=C1C2=CC(=O)C3=C(C=C(C=C3O2)OC4C(C(C(C(O4)CO)O)O)O)O)O)O	PEFNSGRTCBGNAN-RSRIQPTJSA-N	luteolin-7-O-β-D-glucopyranoside	XOI	10.1111/cbdd.13437	30403440
79	135398658	59-30-3	O=C(O)C(NC(=O)c1ccc(NCc2nc3C(=O)NC(N)=Nc3nc2)cc1)CCC(=O)O	OVBPIULPVIDEAO-LBPRGKRZSA-N	Folic acid	XOI	not availiable	3015962
80	667639	4339-71-3	Oc1c(O)ccc(C=Cc2cc(O)cc(O)c2)c1	CDRPUGZCRXZLFL-OWOJBTEDSA-N	Piceatannol	XOI	not availiable	22108298
81	44257888	not availiable	CC1C(C(C(C(O1)OCC2C(C(C(C(O2)OC3=CC(=C4C(=C3)OC(=CC4=O)C5=CC=C(C=C5)OC)O)O)O)O)O)O)O	YFVGIJBUXMQFOF-OFSFZXSLSA-N	Acacetin 7-rutinoside	XOI	10.1111/cbdd.13437	30403440
82	162464	41365-32-6	COC1=C(C=CC(=C1)C2=CC(=O)C3=C(C(=C(C=C3O2)OC)OC)O)O	VKOSQMWSWLZQPA-UHFFFAOYSA-N	cirsilineol	XOI	10.1111/cbdd.13437	30403440
83	5281703	632-85-9	O(C)c1c(O)cc(O)c2C(=O)C=C(c3ccccc3)Oc12	XLTFNNCXVBYBSX-UHFFFAOYSA-N	Wogonin	XOI	not availiable	8297130
84	323	91-64-5	O=C1Oc2c(cccc2)C=C1	ZYGHJZDHTFUPRJ-UHFFFAOYSA-N	Coumarin	XOI	10.3969/j.issn.1009-2501.2005.04.025	not availiable
85	44258702	not availiable	COC1=C(OC2=C(C1=O)C=CC(=C2O)O)C3=CC(=C(C=C3)O)O	WGIWCQHSJILTOY-UHFFFAOYSA-N	transilitin	XOI	10.1111/cbdd.13437	30403440
86	5280460	92-61-5	O(C)c1c(O)cc2OC(=O)C=Cc2c1	RODXRVNMMDRFIK-UHFFFAOYSA-N	Scopoletin	XOI	10.1055/s-2005-837789	not availiable
87	3080714	18466-51-8	C1=CC(=CC=C1C2=[O+]C3=CC(=CC(=C3C=C2OC4C(C(C(C(O4)CO)O)O)O)O)O)O.[Cl-]	CAHGSEFWVUVGGL-UBNZBFALSA-N	Pelargonidin-3-glucoside	XOI	10.1111/cbdd.13437	30403440
88	5280442	480-44-4	O(C)c1ccc(C=2Oc3c(c(O)cc(O)c3)C(=O)C=2)cc1	DANYIYRPLHHOCZ-UHFFFAOYSA-N	Acacetin	XOI	10.1248/cpb.53.984	16079532
89	443654	68795-37-9	COC1=C(C=CC(=C1)C2=[O+]C3=CC(=CC(=C3C=C2OC4C(C(C(C(O4)CO)O)O)O)O)O)O	ZZWPMFROUHHAKY-OUUKCGNVSA-O	Peonidin-3-glucoside	XOI	10.1111/cbdd.13437	30403440
90	932	67604-48-2	O=C1c2c(O)cc(O)cc2OC(c2ccc(O)cc2)C1	FTVWIRXFELQLPI-UHFFFAOYSA-N	naringenin	XOI	10.1055/s-2002-26753	11988866
91	439533	75714-88-4	C1=CC(=C(C=C1C2C(C(=O)C3=C(C=C(C=C3O2)O)O)O)O)O	CXQWRCVTCMQVQX-LSDHHAIUSA-N	(2R, 3R) taxifolin	XOI	10.1055/s-2002-26753	11988866
92	5281708	486-66-8	C1=CC(=CC=C1C2=COC3=C(C2=O)C=CC(=C3)O)O	ZQSIJRDFPHDXIC-UHFFFAOYSA-N	daidzein	XOI	10.1111/cbdd.13437	30403440
93	5281643	482-36-0	C1=CC(=C(C=C1C2=C(C(=O)C3=C(C=C(C=C3O2)O)O)OC4C(C(C(C(O4)CO)O)O)O)O)O	OVSQVDMCBVZWGM-DTGCRPNFSA-N	Hyperoside	XOI	10.1016/j.fct.2007.03.015	17493733
94	444539	140-10-3	C1=CC=C(C=C1)C=CC(=O)O	WBYWAXJHAXSJNI-VOTSOKGWSA-N	Cinnamic acid	XOI	10.1111/cbdd.13437	30403440
95	5281416	305-01-1	O=C1Oc2c(cc(O)c(O)c2)C=C1	ILEDWLMCKZNDJK-UHFFFAOYSA-N	Aesculetin	XOI	10.1016/j.jep.2004.04.012	15234783
96	65090	2009-24-7	O=C1Oc2c(O)c3occc3cc2C=C1	JWVYQQGERKEAHW-UHFFFAOYSA-N	Xanthotoxol	XOI	10.1016/j.jep.2004.04.012	15234783
97	8294	115-95-7	O=C(OC(C=C)(CCC=C(C)C)C)C	UWKAYLJWKGQEPM-UHFFFAOYSA-N	Bergamol	XOI	10.1016/j.jep.2004.04.012	15234783
98	6199	66-97-7	O=C1Oc2c(cc3c(occ3)c2)C=C1	ZCCUUQDIBDJBTK-UHFFFAOYSA-N	Psoralen	XOI	10.1016/j.jep.2004.04.012	15234783
99	13650	939-19-5	O=C1C(O)=Cc2c(O1)cccc2	MJKVTPMWOKAVMS-UHFFFAOYSA-N	3-Hydroxycoumarin	XOI	10.1016/j.bcp.2007.11.023	18201686
100	54682930	1076-38-6	O=C1Oc2c(C(O)=C1)cccc2	VXIXUWQIVKSKSA-UHFFFAOYSA-N	4-Hydroxycoumarin	XOI	10.1016/j.bcp.2007.11.023	18201686
101	69894	776-86-3	O(C)c1c(O)cc2c(OC(=O)C=C2)c1	SYTYLPHCLSSCOJ-UHFFFAOYSA-N	6-Hydroxy-7-methoxycoumarin	XOI	10.1016/j.bcp.2007.11.023	18201686
102	10212	482-44-0	O(CC=C(C)C)c1c2occc2cc2c1OC(=O)C=C2	OLOOJGVNMBJLLR-UHFFFAOYSA-N	Imperatorin	XOI	10.1016/j.phymed.2013.04.021	not availiable
103	68079	482-27-9	O(C)c1c2occc2c(OC)c2c1OC(=O)C=C2	DFMAXQKDIGCMTL-UHFFFAOYSA-N	5,8-dimethoxypsoralen	XOI	10.2174/1573406411666150130145246	25633370
104	66065	477-90-7	O(C)c1c(O)c2c(C(=O)OC3C(O)C(O)C(CO)OC23)cc1O	YWJXCIXBAKGUKZ-HJJNZUOJSA-N	Bergenin	XOI	10.19405/j.cnki.issn1000-1492.2014.01.016	not availiable
105	637542	501-98-4	C1=CC(=CC=C1C=CC(=O)O)O	NGSWKAQJJWESNS-ZZXKWVIFSA-N	p-coumaric acid	XOI	10.1111/cbdd.13437	30403440
106	5280459	522-12-3	O=C1C(OC2C(O)C(O)C(O)C(C)O2)=C(c2cc(O)c(O)cc2)Oc2c1c(O)cc(O)c2	OXGUCUVFOIWWQJ-HQBVPOQASA-N	Quercitrin	XOI	10.1016/j.jep.2004.03.037	15182918
107	348154	1078-61-1	C1=CC(=C(C=C1CCC(=O)O)O)O	DZAUWHJDUNRCTF-UHFFFAOYSA-N	dihydrocaffeic acid	XOI	10.1111/cbdd.13437	30403440
108	5281628	1447-88-7	O(C)c1c(O)c2C(=O)C=C(c3ccc(O)cc3)Oc2cc1O	IHFBPDAQLQOCBX-UHFFFAOYSA-N	Hispidulin	XOI	10.1055/s-2005-873181	16450295
109	5379096	18085-97-7	O(C)c1c(O)c2C(=O)C=C(c3cc(OC)c(O)cc3)Oc2cc1O	GLAAQZFBFGEBPS-UHFFFAOYSA-N	Jaceosidin	XOI	10.1016/s1001-9294(14)60075-4	25429747
110	97214	855-96-9	O(C)c1c(O)c2C(=O)C=C(c3cc(O)c(OC)cc3)Oc2cc1OC	KLAOKWJLUQKWIF-UHFFFAOYSA-N	Eupatorin	XOI	10.2174/1573406413666161219161946	27991400
111	10621	520-26-3	O(C)c1c(O)cc(C2Oc3c(c(O)cc(OC4C(O)C(O)C(O)C(COC5C(O)C(O)C(O)C(C)O5)O4)c3)C(=O)C2)cc1	QUQPHWDTPGMPEX-QJBIFVCTSA-N	Hesperidin	XOI	not availiable	8297130
112	13250	831-61-8	O=C(OCC)c1cc(O)c(O)c(O)c1	VFPFQHQNJCMNBZ-UHFFFAOYSA-N	Ethyl gallate	XOI	10.1177/1934578x1100600819	21922915
113	7428	99-24-1	O=C(OC)c1cc(O)c(O)c(O)c1	FBSFWRHWHYMIOG-UHFFFAOYSA-N	Methyl gallate	XOI	10.1177/1934578x1100600819	21922915
114	6474309	89886-30-6	O=C(OC1C(OC(=O)C=Cc2cc(O)c(O)cc2)CC(O)(C(=O)O)CC1O)C=Cc1cc(O)c(O)cc1	UFCLZKMFXSILNL-RVXRWRFUSA-N	4,5-Di-O-caffeoylquinic acid	XOI	10.1016/S1875-5364(14)60017-0	24636060
115	60150332	2450-53-5	O=C(OC1C(O)C(OC(=O)C=Cc2cc(O)c(O)cc2)CC(O)(C(=O)O)C1)C=Cc1cc(O)c(O)cc1	KRZBCHWVBQOTNZ-UHFFFAOYSA-N	3,5-Di-O-caffeoylquinic acid	XOI	10.1016/S1875-5364(14)60017-0	24636060
116	5281769	30964-13-7	C1C(C(C(CC1(C(=O)O)OC(=O)C=CC2=CC(=C(C=C2)O)O)OC(=O)C=CC3=CC(=C(C=C3)O)O)O)O	YDDUMTOHNYZQPO-RVXRWRFUSA-N	cynarin	XOI	10.1111/cbdd.13437	30403440
117	122213508	not availiable	CC1CCC2(CCC3(C(=CCC4C3(CCC5C4(CCC(C5(C)C)OC6C(C(C(CO6)O)O)OC7C(C(C(C(O7)CO)O)O)O)C)C)C2C1(C)O)C)C(=O)O	WBDDWIKJZNNKBQ-WRNGJEEHSA-N	Ilexsaponin B1	XOI	10.1111/cbdd.13437	30403440
118	5281764	6537-80-0	O=C(OC(C(=O)O)C(OC(=O)C=Cc1cc(O)c(O)cc1)C(=O)O)C=Cc1cc(O)c(O)cc1	YDDGKXBLOXEEMN-IABMMNSOSA-N	Chicory acid	XOI	10.1089/jmf.2013.2991	25314375
119	73568	23094-69-1	O=C(OC1C(O)C2C(O)C(O1)COC(=O)c1c(c(O)c(O)c(O)c1)-c1c(O)c(O)c(O)cc1C(=O)O2)c1cc(O)c(O)c(O)c1	TUSDEZXZIZRFGC-XIGLUPEJSA-N	Corilagin	XOI	not availiable	21922915
120	439499	486-55-5	O=C1Oc2c(O)c(OC3C(O)C(O)C(O)C(CO)O3)ccc2C=C1	HOIXTKAYCMNVMY-PVOAASPHSA-N	Daphnin	XOI	10.3390/v4040539	22590685
121	72426	95733-03-2	O=C(c1c(O)cc(O)cc1O)c1c(-c2ccc(O)cc2)oc2c1c1OC(c3ccc(O)cc3)CCc1c(O)c2	SFIBBWQCUADULX-QHCPKHFHSA-N	Daphnodorin A	XOI	10.3390/v4040539	22590685
122	73813191	not availiable	CC1CCC2(CCC3(C(=CCC4C3(CCC5C4(CCC(C5(C)C)OC6C(C(C(CO6)O)O)OC7C(C(C(C(O7)CO)O)O)OC8C(C(C(C(O8)C)O)O)O)C)C)C2C1(C)O)C)C(=O)O	KWHRIYSRPSARCX-UHFFFAOYSA-N	ilexsaponin B2	XOI	10.1111/cbdd.13437	30403440
123	10177	not availiable	C1=CC=C2C(=C1)C(=C(N2)O)C3=NC4=CC=CC=C4C3=O	JNLNPCNGMHKCKO-UHFFFAOYSA-N	indirubin	XOI	10.1111/cbdd.13437	30403440
124	2883607	not availiable	C1=CC=C2C(=C1)C(=CN2)C3(C4=CC=CC=C4NC3=O)C5=CNC6=CC=CC=C65	BSOAGODEMKWJIG-UHFFFAOYSA-N	trisindoline	XOI	10.1111/cbdd.13437	30403440
125	2353	2086-83-1	COC1=C(C2=C[N+]3=C(C=C2C=C1)C4=CC5=C(C=C4CC3)OCO5)OC	YBHILYKTIRIUTE-UHFFFAOYSA-N	berberine	XOI	10.1111/cbdd.13437	30403440
126	73202	548-82-3	O=C1C(O)C(c2ccccc2)Oc2c1c(O)cc(O)c2	SUYJZKRQHBQNCA-LSDHHAIUSA-N	Pinobanksin	XOI	10.1016/j.jff.2016.03.021	not availiable
127	68071	480-39-7	O=C1c2c(O)cc(O)cc2OC(c2ccccc2)C1	URFCJEUYXNAHFI-ZDUSSCGKSA-N	Pinocembrin	XOI	10.1016/j.jff.2016.03.021	not availiable
128	124049	41983-91-9	O=C1c2c(O)cc(O)c(CC=C(C)C)c2OC(c2ccccc2)C1	DAWSYIQAGQMLFS-SFHVURJKSA-N	Glabranin	XOI	10.1016/j.jff.2016.03.021	not availiable
129	5284651	10236-47-2	CC1C(C(C(C(O1)OC2C(C(C(OC2OC3=CC(=C4C(=O)CC(OC4=C3)C5=CC=C(C=C5)O)O)CO)O)O)O)O)O	DFPMSGMNTNDNHN-CSIAVLANSA-N	naringin	XOI	10.1016/j.foodchem.2020.126807	32330646
130	5748957	116313-85-0	O=[N+]([O-])c1c(O)c(O)cc(C=O)c1	BBFJODMCHICIAA-UHFFFAOYSA-N	3,4-Dihydroxy-5-nitrobenzaldehyde	XOI	10.1016/j.bcp.2013.08.011	23994369
131	10096344	668270-12-0	O=C1N(Cc2nc(C)c3c(n2)cccc3)C(=O)c2n(CC#CC)c(N3CC(N)CCC3)nc2N1C	LTXREWYXXSTFRX-QGZVFWFLSA-N	Linagliptin	XOI	10.1016/j.ijcard.2014.07.023	25065332
132	31553	22888-70-6	O(C)c1c(O)ccc(C2C(CO)Oc3c(O2)cc(C2C(O)C(=O)c4c(O)cc(O)cc4O2)cc3)c1	SEBFKMXJBCUCAI-HKTJVKLFSA-N	silibinin	XOI	10.1021/np8007123	19388706
133	91144	24211-30-1	CC1=C(C(=C2C(=C1O)C(=O)CC(O2)C3=CC=C(C=C3)O)C)O	DYHOLQACRGJEHX-UHFFFAOYSA-N	farrerol	XOI	10.1016/j.foodchem.2020.126807	32330646
134	5281647	4773-96-0	O=C1c2c(O)c(c(O)cc2Oc2c1cc(O)c(O)c2)C1C(O)C(O)C(O)C(CO)O1	AEDDIBAIWPIIBD-ZJKJAXBQSA-N	Mangiferin	XOI	10.1016/s0006-2952(03)00041-8	12694877
135	10168	478-43-3	O=C(O)c1cc(O)c2C(=O)c3c(O)cccc3C(=O)c2c1	FCDLCPWAQCPTKC-UHFFFAOYSA-N	Rhein	XOI	10.1155/2015/329831	26221172
136	107848	24512-63-8	O=C(OC)C1=COC(OC2C(O)C(O)C(O)C(CO)O2)C2C(CO)=CCC12	IBFYXTRXDNAPMM-BVTMAQQCSA-N	Geniposide	XOI	10.1016/j.ejphar.2004.05.031	15249171
137	6443484	102841-42-9	O(c1cc(O)cc(C=Cc2c(O)cc(OC3C(O)C(O)C(O)C(CO)O3)cc2)c1)C1C(O)C(O)C(O)C(CO)O1	HPSWAEGGWLOOKT-VUNDNAJOSA-N	Mulberroside A	XOI	10.1055/s-0030-1250599	21154198
138	5281800	61276-17-3	O=C(OC1C(OC2C(O)C(O)C(O)C(C)O2)C(O)C(OCCc2cc(O)c(O)cc2)OC1CO)C=Cc1cc(O)c(O)cc1	FBSKJMQYURKNSU-ZLSOWSIRSA-N	Acteoside	XOI	10.1055/s-2006-960854	10630118
139	5281417	531-75-9	O=C1Oc2c(cc(OC3C(O)C(O)C(O)C(CO)O3)c(O)c2)C=C1	XHCADAYNFIFUHF-TVKJYDDYSA-N	Esculin	XOI	10.1016/j.jpba.2005.03.018	15894450
140	5273569	574-84-5	O(C)c1c(O)c(O)c2OC(=O)C=Cc2c1	HAVWRBANWNTOJX-UHFFFAOYSA-N	Fraxetin	XOI	10.1016/j.ejphar.2011.05.021	21620826
141	5273568	524-30-1	O(C)c1c(O)c(OC2C(O)C(O)C(O)C(CO)O2)c2OC(=O)C=Cc2c1	CRSFLLTWRCYNNX-QBNNUVSCSA-N	Fraxin	XOI	10.1016/j.ejphar.2011.05.021	21620826
142	5319924	19275-47-9	O=C1C(CC=C(C)C)=C(c2c(O)cc(O)cc2)Oc2c1c(O)c(CC=C(C)C)c(O)c2	MUUDYSFWQUSAOO-UHFFFAOYSA-N	CudraflavoneC	XOI	not availiable	4972775
143	21596130	56486-94-3	O=C1c2c(O)cc(O)cc2OC(c2c(O)cc(O)cc2)C1	QBLQLKNOKUHRCH-UHFFFAOYSA-N	Steppogenin	XOI	10.1016/j.jep.2012.08.023	22967667
144	5481970	520-30-9	O=C1c2c(O)cc(O)cc2OC(c2c(O)cc(O)cc2)=C1	ZSYPIPFQOQGYHH-UHFFFAOYSA-N	Norartocarpetin	XOI	10.1016/j.jep.2012.08.023	22967667
145	9862769	76472-88-3	O=C(C=Cc1c(O)cc(O)cc1)c1c(O)c(CC=C(C)C)c(O)cc1	NXBYIJSAISXPKJ-WEVVVXLNSA-N	Morachalcone A	XOI	10.1016/j.jep.2012.08.023	22967667
146	5281222	487-52-5	O=C(C=Cc1cc(O)c(O)cc1)c1c(O)cc(O)cc1	AYMYWHCQALZEGT-ORCRQEGFSA-N	Butein	XOI	10.1016/j.phymed.2016.12.002	not availiable
147	5280804	482-35-9	O=C1C(OC2C(O)C(O)C(O)C(CO)O2)=C(c2cc(O)c(O)cc2)Oc2c1c(O)cc(O)c2	OVSQVDMCBVZWGM-QSOFNFLRSA-N	Isoquercetin	XOI	10.1080/14756360701841301	18608746
148	21721909	54510-13-3	O=C1C(CC=C(CCC=C(C)C)C)=C(c2c(O)cc(O)cc2)Oc2c1ccc(O)c2	VEQHJLTWOODSMA-FRKPEAEDSA-N	Rubraflavone A	XOI	10.1016/j.jep.2012.08.023	22967667
149	493570	83-88-5	O=C1N=C2N(CC(O)C(O)C(O)CO)c3c(N=C2C(=O)N1)cc(C)c(C)c3	AUNGANRZJHBGPY-SCRDCRAPSA-N	Riboflavin	XOI	not availiable	14151054
150	232990	13241-33-3	CC1C(C(C(C(O1)OC2C(C(C(OC2OC3=CC(=C4C(=O)CC(OC4=C3)C5=CC(=C(C=C5)OC)O)O)CO)O)O)O)O)O	ARGKVCXINMKCAZ-UHFFFAOYSA-N	neohesperidin	XOI	10.1016/j.foodchem.2020.126807	32330646
